# Supplementary material for: RIF1 promotes tumor growth and cancer stem cell-like traits in NSCLC by protein phosphatase 1-mediated activation of Wnt/β-catenin signaling
Source: PubMed Central journal article supplement (PMC6148239; doi:10.1038/s41419-018-0972-4), 2018-09-20
Supplement: 41419_2018_972_MOESM1_ESM.pdf [file 41419_2018_972_MOESM1_ESM.pdf]

**Table S1 Relationship between RIF1 expression and clinicopathological factors in 62 lung cancer patients**

| Characteristics          | RIF1 expression |                | P-value |
|--------------------------|-----------------|----------------|---------|
|                          | Low<br>(n=30)   | High<br>(n=32) |         |
| Age                      |                 |                |         |
| Years(mean ± SD)         | 58.62±7.09      | 57.97±6.98     | 0.59    |
| Sex                      |                 |                |         |
| Male                     | 26              | 27             | 0.798   |
| Female                   | 4               | 5              |         |
| Stage                    |                 |                |         |
| I + II                   | 19              | 12             | 0.042*  |
| III+IV                   | 11              | 20             |         |
| Lymph node status        |                 |                |         |
| N0                       | 17              | 14             | 0.309   |
| N1-3                     | 13              | 18             |         |
| Distal metastasis status |                 |                |         |
| M0                       | 29              | 28             | 0.355   |
| M1                       | 1               | 4              |         |
| Differentiation          |                 |                |         |
| Poorly                   | 3               | 9              | 0.036*  |
| Moderately               | 19              | 21             |         |
| High                     | 8               | 2              |         |

\* P<0.05 was considered significant.
