# Supplementary material for: RIF1 promotes tumor growth and cancer stem cell-like traits in NSCLC by protein phosphatase 1-mediated activation of Wnt/β-catenin signaling
Source: PubMed Central journal article supplement (PMC6148239; doi:10.1038/s41419-018-0972-4), 2018-09-20
Supplement: 41419_2018_972_MOESM2_ESM.pdf [file 41419_2018_972_MOESM2_ESM.pdf]

**Table S2 Sequences of primers for quantitative real-time PCR**

| Gene name        | Forward primer sequence (5' → 3') | Reverse primer sequence (5' → 3') |
|------------------|-----------------------------------|-----------------------------------|
| $\beta$ -actin   | CATGTACGTTGCTATCCAGGC             | CTCCTTAATGTCACGCACGAT             |
| RIF1             | TGGCAGATGACATTGATAGA              | TAGATTGTGTAGTAGGAGAAGTT           |
| AXIN             | GGTTTCCCCTTGGACCTCG               | CCGTCGAAGTCTCACCTTTAATG           |
| $\beta$ -catenin | CATCTACACAGTTTGATGCTGCT           | GCAGTTTTGTCAGTTCAGGGA             |
